# Supplementary material
Source: Springer Nature journal article supplement (https://www.springermedizin.de/resource/supplementary/12936_2011_1810_MOESM7_ESM.pdf/9541780)

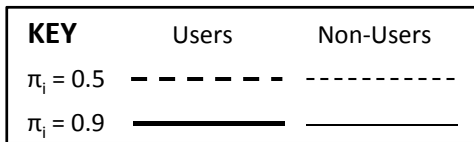

*An. arabiensis* with  
alternative hosts

*An. gambiae* with  
no alternative hosts

$\Omega = \text{Deterrent only}$

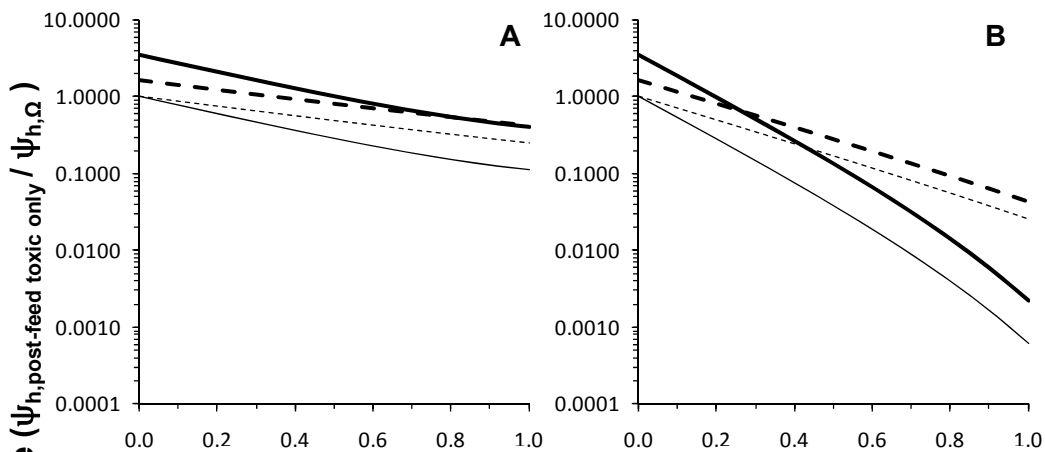

$\Omega = \text{Deterrent and pre-feed toxic}$

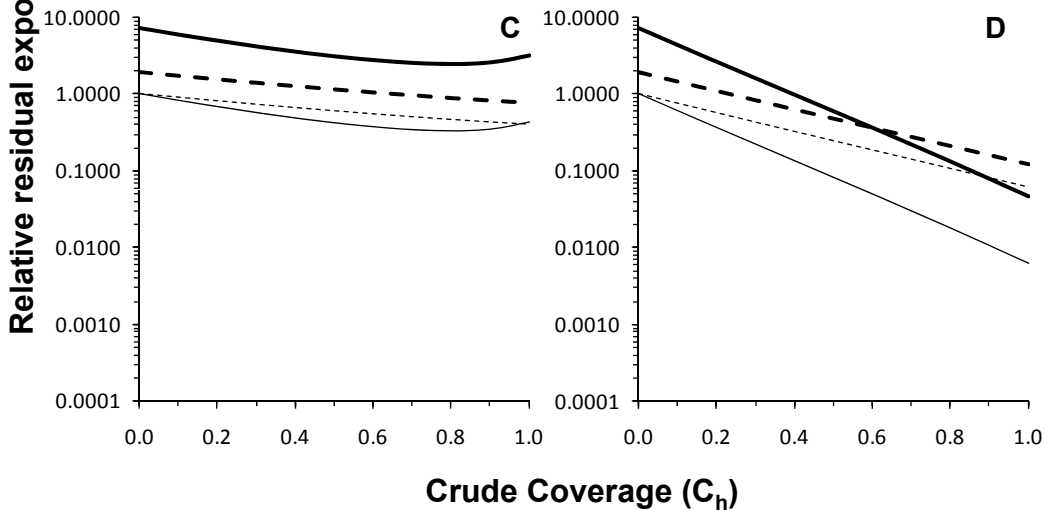

Supplement: MOESM7 [file 9541780]
